# Supplementary material for: The origin and adaptive evolution of domesticated populations of yeast from Far East Asia
Source: PubMed Central journal article supplement (PMC6043522; doi:10.1038/s41467-018-05106-7), 2018-07-12
Supplement: 41467_2018_5106_MOESM3_ESM.pdf [file 41467_2018_5106_MOESM3_ESM.pdf]

## **Description of Additional Supplementary Files**

**File Name:** Supplementary Data 1

**Description:** *Saccharomyces cerevisiae* isolates sequenced and their ecological and geographic origins.

**File Name:** Supplementary Data 2

**Description:** Genome sequence data and sporulation rates of *S. cerevisiae* isolates employed.

**File Name:** Supplementary Data 3

**Description:** Genetic diversity within and divergence between different groups, populations or lineages of *S. cerevisiae*.

**File Name:** Supplementary Data 4

**Description:** Proportions of shared polymorphisms among different populations and lineages of *S. cerevisiae* in China

**File Name:** Supplementary Data 5

**Description:** Ploidy and chromosome copy-number variations of *S. cerevisiae* isolates.

**File Name:** Supplementary Data 6

**Description:** Copy number variation (CNV) of genes between different populations or lineages of *S. cerevisiae* (a) and functional descriptions of the genes related grouped by GO categories (b).

**File Name:** Supplementary Data 7

**Description:** Introgression and horizontal gene transfer (HGT) events in wild and domesticated isolates of *S. cerevisiae* (a) and genes harbored in the HGT and introgression fragments (b).

**File Name:** Supplementary Data 8

**Description:** Phenotypic characterization of 266 *S. cerevisiae* isolates employed.

**File Name:** Supplementary Data 9

**Description:** Genes subject to positive and purifying selection detected by the MK test from wild and domesticated *S. cerevisiae* isolates (a) and GO enrichment analysis of genes subject to purifying selection (b).
